# Supplementary material for: Identification and differential expression of serotransferrin and apolipoprotein A-I in the plasma of HIV-1 patients treated with first-line antiretroviral therapy
Source: Springer Nature journal article supplement (doi:10.1186/s12879-020-05610-6), 2020-11-27
Supplement: MOESM6 [file 18634928]

## Supplementary file-6

Protein networks and Gene ontology of serotransferrin and apolipoprotein-A1 by STRING - V 11.0

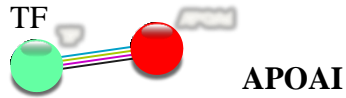

Number of nodes: 2

Number of edges: 1

Average node degree:1

Avg. local clustering coefficient: 1

Expected number of edges:0 PPI enrichment p-value: 0.0486 your network has significantly more interactions than expected (what does that mean?)

### Biological Process( GO)

| GO-term    | Description                     | Count in gene set | False discovery rate |
|------------|---------------------------------|-------------------|----------------------|
| GO:0002576 | Platelet degranulation          | 2 of 129          | 0.0201               |
| GO:0031647 | Regulation of protein stability | 2 of 251          | 0.0377               |

### Cellular Component (GO)

| GO-term    | Description                    | Count in gene set | False discovery rate |
|------------|--------------------------------|-------------------|----------------------|
| GO:0034774 | Secretory granule lumen        | 2 of 323          | 0.0172               |
| GO:0030139 | Endocytic vesicle              | 2 of 275          | 0.0172               |
| GO:0009986 | Cell surface                   | 2 of 690          | 0.0172               |
| GO:0005788 | Endoplasmic reticulum<br>lumen | 2 of 299          | 0.0172               |
| GO:0005769 | Early endosome                 | 2 of 341          | 0.0172               |

**Molecular function analysis by panther**  
**15.0**

| Family ID      | Mapped IDs                           | Family Name        | PANTHER GO-Slim Molecular Function |
|----------------|--------------------------------------|--------------------|------------------------------------|
| PTHR18976:SF11 | HUMAN  HGNC=600<br>UniProt KB=P02647 | APOLIPOPROTEIN A-I | Cholesterol binding                |
|                |                                      |                    | O-acyltransferase activity         |
|                |                                      |                    | Enzyme activator activity          |
|                |                                      |                    | Phospholipid binding               |

**Reactome pathways**

| Pathways              | Description                                              | Count in gene set |
|-----------------------|----------------------------------------------------------|-------------------|
| False discovery rate  |                                                          |                   |
| HSA-8957275<br>0.0013 | Post-translational protein phosphorylation               | 2 of 106          |
| HSA-381426<br>0.0013  | Regulation of Insulin-like Growth Factor (IGF) transport | 2 of 123          |
| HSA-114608<br>0.0013  | Platelet degranulation                                   | 2 of 125          |
| HSA-5653656<br>0.0068 | Vesicle-mediated transport                               | 2 of 649          |
| HSA-382551<br>0.0070  | Transport of small molecules                             | 2 of 706          |
